# Supplementary material for: The effect of grafted alkyl side chains on the properties of poly(terphenyl piperidinium) based high temperature proton exchange membranes
Source: Royal Society of Chemistry journal article supplement (doi:10.1039/d3im00064h), 2023-01-01
Supplement: d3im00064h1.pdf [file d3im00064h1.pdf]

## Supporting Information

### The effect of grafted alkyl side chains on properties of poly(terphenyl piperidinium) based high temperature proton exchange membranes

Xuefu Che,<sup>†</sup> Lele Wang,<sup>†</sup> Ting Wang, Jianhao Dong and Jingshuai Yang\*

Department of Chemistry, College of Sciences, Northeastern University, Shenyang 110819, China, \*Corresponding author (E-mail: yjs@mail.neu.edu.cn)

<sup>†</sup>These authors contributed equally to this work.

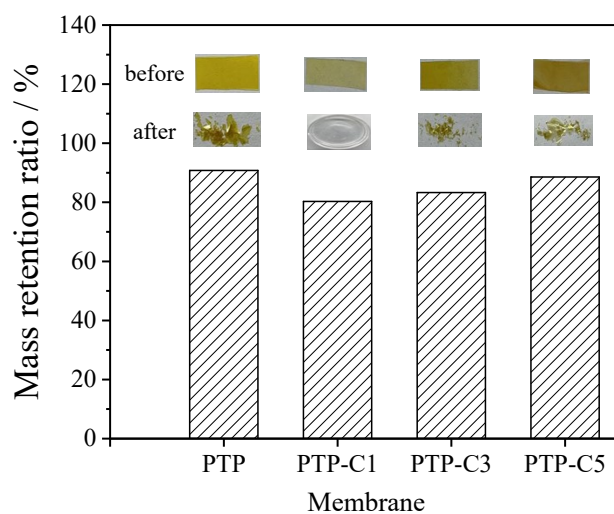

Figure S1 Fenton test of PTP and PTP-Cx membranes in 3 wt% H<sub>2</sub>O<sub>2</sub> and 4 ppm Fe<sup>2+</sup> solution at 68 °C for 48h; the insert photos show the appearance of membranes before and after Fenton test.
